# Supplementary material
Source: publisher figshare collection journal article supplement (https://acs.figshare.com/ndownloader/files/20421330)
Supplement: Supplementary file 1 [file 20421330]

## Supporting Information:

# Signatures of specific DNA binding by the AT-rich interaction domain of BAF250a

*Malyasree Giri<sup>1,§</sup>, Aditi Maulik<sup>1,§</sup> and Mahavir Singh<sup>1,2,\*</sup>*

*<sup>§</sup> Equal contribution*

<sup>1</sup>Molecular Biophysics Unit, Indian Institute of Science, Bengaluru, 560012, INDIA

<sup>2</sup>NMR Research Centre, Indian Institute of Science, Bengaluru, 560012, INDIA

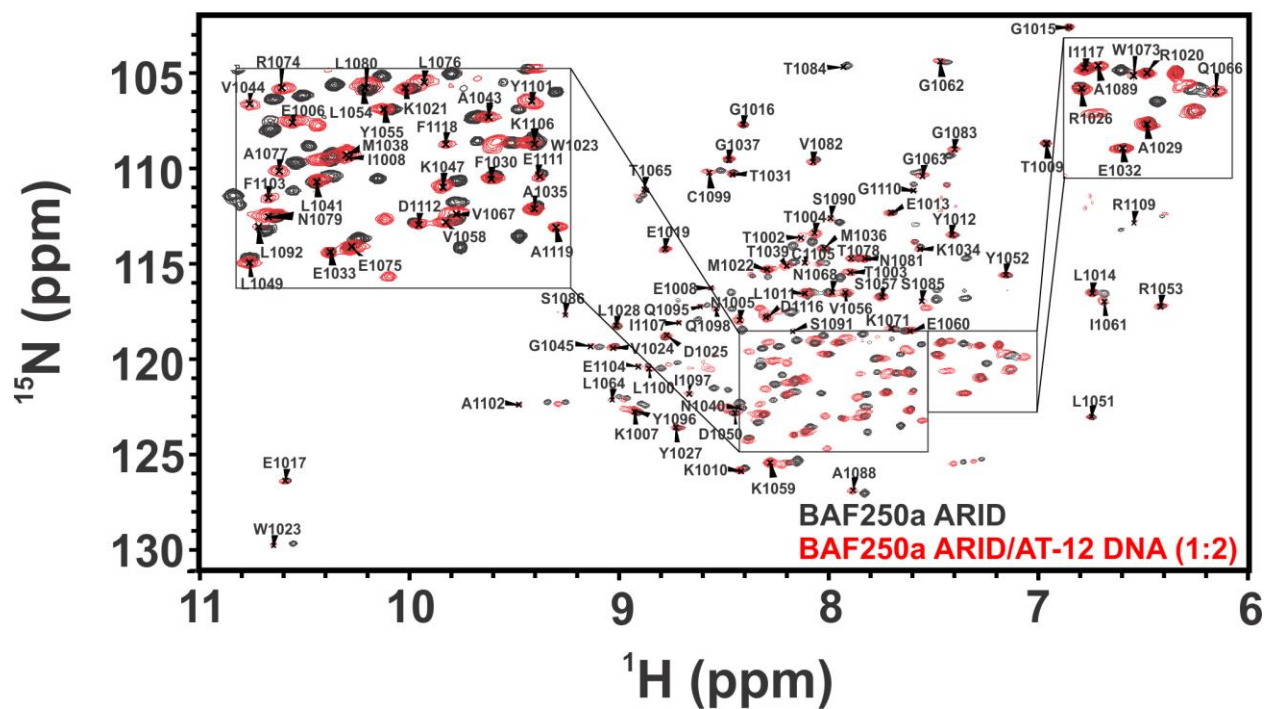

**Figure S1.** Overlay of 2D  $^1\text{H}$ - $^{15}\text{N}$  TROSY-HSQC spectra of free BAF250a ARID (black) and BAF250a ARID/AT-12 DNA complex (red) with the assignment of the cross peaks marked in the spectra (taken from BMRB entry with accession code 5748).

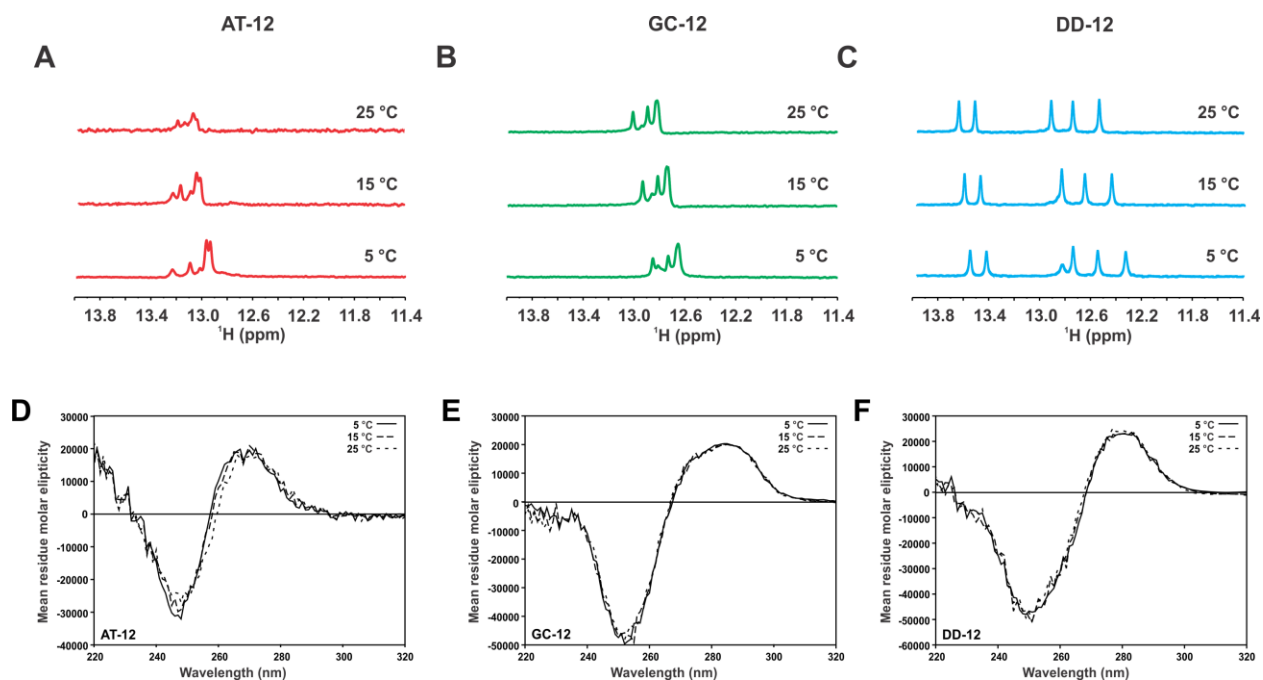

**Figure S2.** 1D  $^1\text{H}$  NMR and CD spectra of dsDNA sequences used in this study at different temperatures. (A) 1D  $^1\text{H}$  NMR spectra of AT-12 DNA. (B) 1D  $^1\text{H}$  NMR spectra of GC-12 DNA. (C) 1D  $^1\text{H}$ -NMR spectra of DD-12. (D-F) Overlay of CD spectra recorded at 5°C, 15°C and 25°C for (D) ds AT-12 (E) GC-12 and (F) DD-12 DNA.

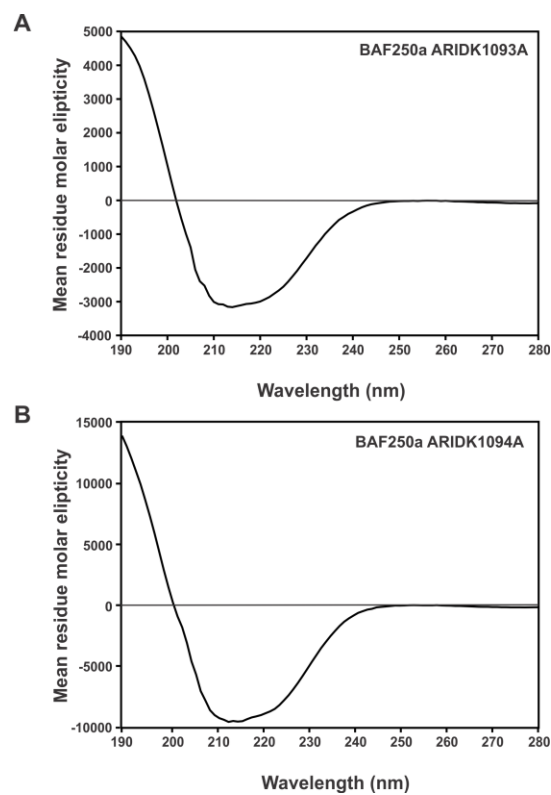

**Figure S3.** Analysis of BAF250a ARID mutants using CD spectroscopy. (A) CD spectrum of BAF250a ARID K1093A. (B) CD spectrum of BAF250a ARID K1094A.

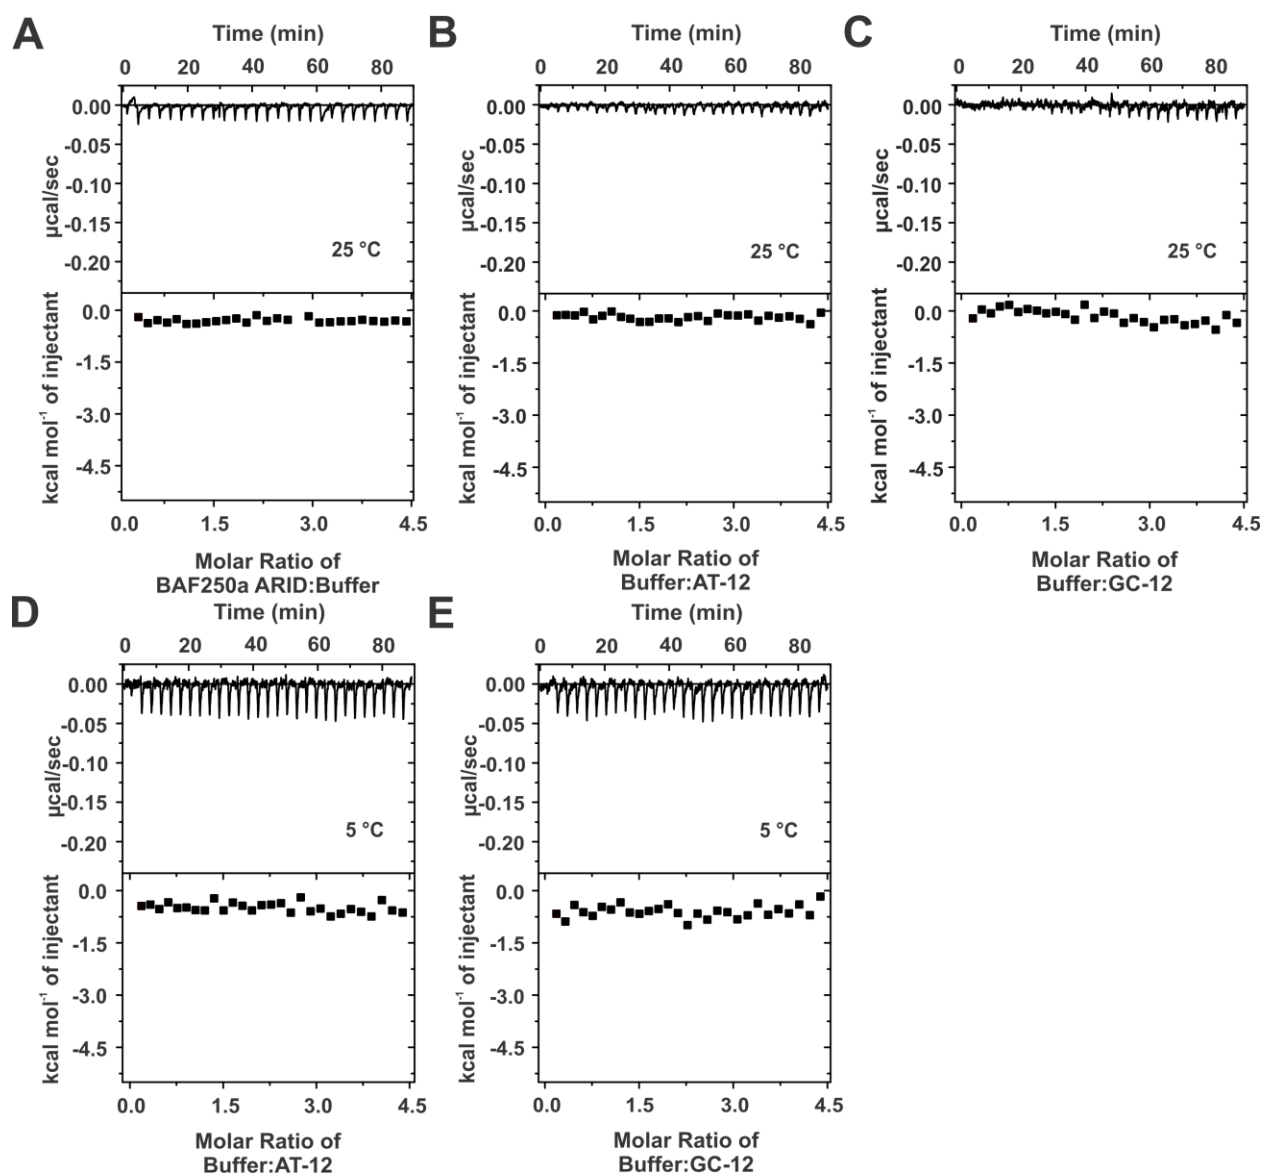

**Figure S4.** ITC isotherms for the 'control' protein into buffer and buffer into DNA titrations. (A) Heat of dilution of BAF250a ARID titrated into buffer at 25 °C. (B) Heat of dilution of buffer titrated into AT-12 DNA at 25 °C. (C) Heat of dilution of buffer titrated into GC-12 DNA at 25 °C. (D) Heat of dilution of buffer titrated into AT-12 DNA at 5 °C. (E) Heat of dilution of buffer titrated into GC-12 DNA at 5 °C.

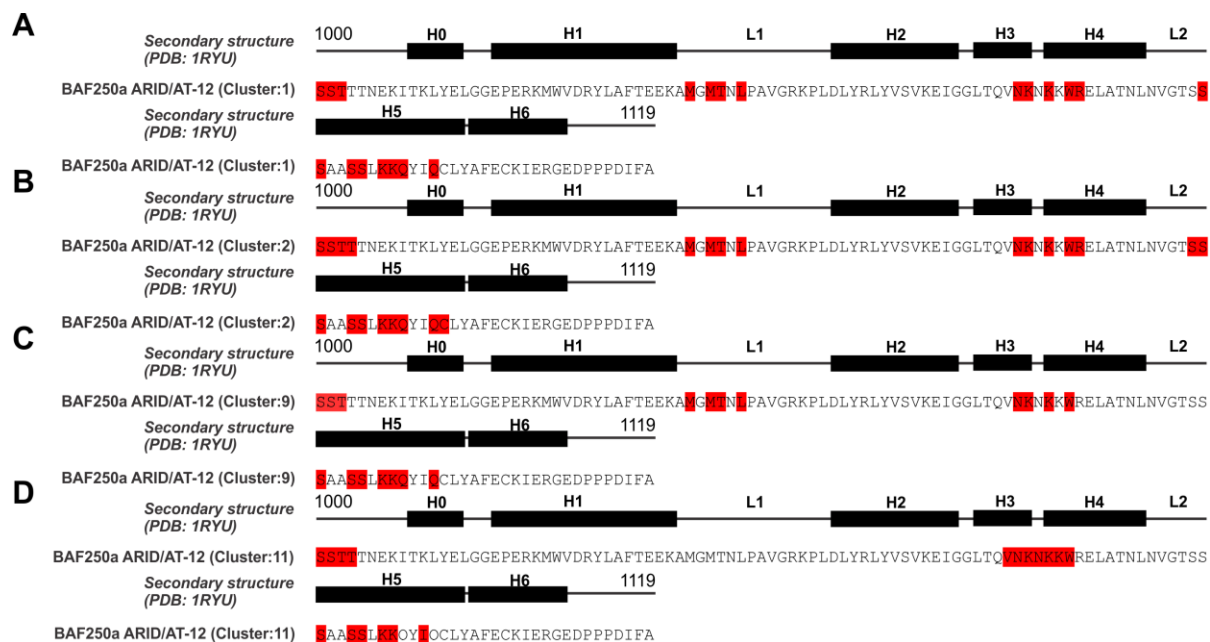

**Figure S5.** Plausible mode of DNA binding by BAF250a ARID in the four major clusters of HADDOCK models. (A-D) The DNA binding residues in top structures from four clusters are marked on the secondary structures of BAF250a ARID. The four clusters are: (A) Cluster 1 (B) Cluster 2 (C) Cluster 9 and (D) Cluster 11. The sequence and secondary structure of BAF250a ARID are shown. The helices are shown in black rectangle. The residues that contact AT-12 DNA in HADDOCK model structures are highlighted in red.

**TABLE S1. Statistics for the NMR CSP driven HADDOCK model of BAF250a ARID in complex with AT-12 DNA**

| Parameter                                     | Value                                    |
|-----------------------------------------------|------------------------------------------|
| HADDOCK score                                 | -107.6 $\pm$ 2.5 a.u.                    |
| Cluster size                                  | 29                                       |
| RMSD from the overall lowest-energy structure | 13.5 $\pm$ 0.2 Å <sup>2</sup>            |
| Van der Waals energy                          | -64.9 $\pm$ 10.0 kcal mol <sup>-1</sup>  |
| Electrostatic energy                          | -374.6 $\pm$ 31.8 kcal mol <sup>-1</sup> |
| Desolvation energy                            | 10.5 $\pm$ 6.6 kcal mol <sup>-1</sup>    |
| Restraints violation energy                   | 216.9 $\pm$ 50.98 kcal mol <sup>-1</sup> |
| Buried surface area                           | 1863.7 $\pm$ 146.7 Å <sup>2</sup>        |
| Z-score                                       | -0.5                                     |
